# Supplementary material for: Ubiquitous Transgenic Overexpression of C-C Chemokine Ligand 2: A Model to Assess the Combined Effect of High Energy Intake and Continuous Low-Grade Inflammation
Source: Hindawi journal article supplement (doi:10.1155/2013/953841), 2013-01-01

**Supplementary material S1, comparison between human and murine CCL2 regions, corresponding to the manuscript:**

## **Ubiquitous transgenic overexpression of C-C chemokine ligand 2: a model to assess the combined effect of high energy intake and continuous low-grade inflammation?**

Esther Rodríguez-Gallego, Marta Riera-Borrull, Anna Hernández-Aguilera, Roger Mariné-Casadó, Anna Rull, Raúl Beltrán-Debón, Fedra Luciano-Mateo, Javier A. Menéndez<sup>1</sup>, Alejandro Vazquez-Martin<sup>1</sup>, Juan J. Sirvent<sup>2</sup>, Vicente Martín-Paredero<sup>3</sup>, Angel L. Corbí<sup>4</sup>, Elena Sierra-Filardi<sup>4</sup>, Gerard Aragonès, Anabel García-Heredia, Jordi Camps, Carlos Alonso-Villaverde<sup>5</sup>, Jorge Joven\*

A, displays a schematic view of human *CCL2* gene region that includes its regulatory region and the most prominent elements identified. The *Ccl2* gene transgenic vector includes the murine CCL2 gene and the comparative position of human ubiquitin promoter (B); sequence is provided in C.

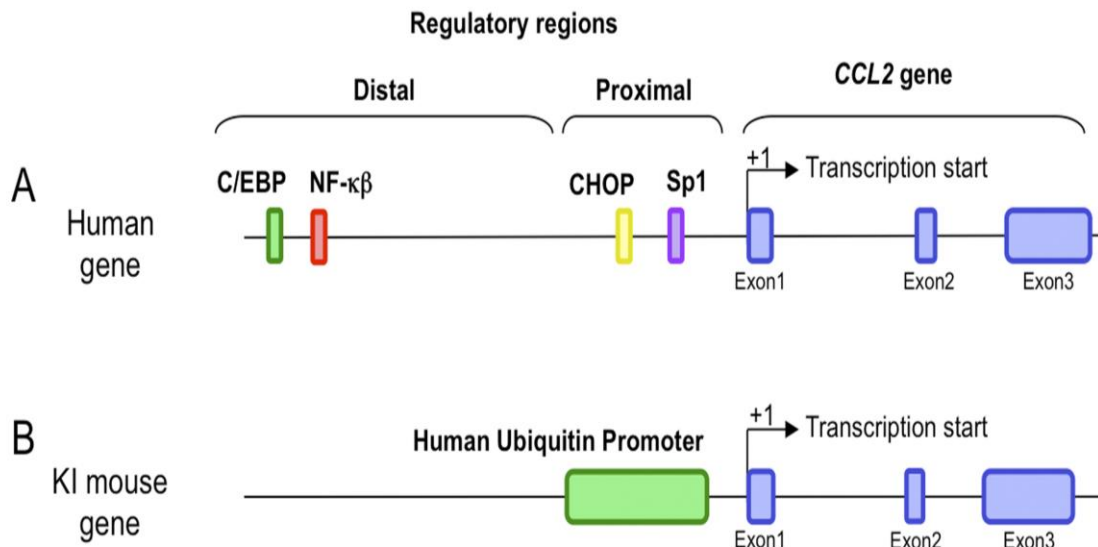

**C**

```

3661 CAGCAGAAGG ACATTTTAGG ACGGGACTTG GGTGACTCTA GGGCACTGGT TTTCTTTCCA
3721 GAGAGCGGAA CAGGCGAGGA AAAGTAGTCC CTTCTCGGCG ATTCTGCGGA GGGATCTCCG
3781 TGGGGCGGTG AACGCCGATG ATTATATAAG GACGCGCCGG GTGTGGCACA GCTAGTTCCG
3841 TCGCAGCCGG GATTTGGGTC GCGGTTCTTG TTTGTGGATC GCTGTGATCG TCACTTGGTG
3901 AGTAGCGGGC TGCTGGGCTG GCCGGGGCTT TCGTGGCCGC CGGGCCGCTC GGTGGGACGG
3961 AAGCGTGTGG AGAGACCGCC AAGGGCTGTA GTCTGGGTCC GCGAGCAAGG TTGCCCTGAA
4021 CTGGGGGTTG GGGGGAGCGC AGCAAAATGG CGGCTGTTCC CGAGTCTTGA ATGGAAGACG
4081 CTTGTGAGGC GGGCTGTGAG GTCGTTGAAA CAAGGTGGGG GGCATGGTGG GCGGCAAGAA
4141 CCCAAGGTCT TGAGGCCTTC GCTAATGCGG GAAAGCTCTT ATTCGGGTGA GATGGGCTGG
4201 GGCACCATCT GGGGACCCCTG ACGTGAAGTT TGTCACTGAC TGGAGAAGTC GGTTTGTGCT
4261 CTGTTGCGGG GGCGGCAGTT ATGGCGGTGC CGTTGGGCAG TGCACCCGTA CCTTTGGGAG
4321 CGCGCGCCCT CGTCGTGTCG TGACGTCACC CGTTCTGTTG GCTTATAATG CAGGGTGGGG
4381 CCACCTGCCG GTAGGTGTGC GGTAGGCTTT TCTCCGTCGC AGGACGCAGG GTTCGGGCCT
4441 AGGGTAGGCT CTCCTGAATC GACAGGCGCC GGACCTCTGG TGAGGGGAGG GATAAGTGAG
4501 GCGTCAGTTT CTTTGGTCCG TTTTATGTAC CTATCTTCTT AAGTAGCTGA AGCTCCGGTT
4561 TTGAACATAT CGCTCGGGGT TGGCGAGTGT GTTTTGTGAA GTTTTTTAGG CACCTTTTGA
4621 AATGTAATCA TTTGGGTCAA TATGTAATTT TCAGTGTTAG ACTAGTAAAT TGCCCGCTAA
4681 ATTCTGGCCG TTTTGGGCTT TTTTGTTAGA CGCCACCATG CATATAACTT CGTATAGCAT

```

**Supplementary material S2, details of the sequence of other main elements used in the construction of the vector, corresponding to the manuscript:**

## **Ubiquitous transgenic overexpression of C-C chemokine ligand 2: a model to assess the combined effect of high energy intake and continuous low-grade inflammation?**

Esther Rodríguez-Gallego, Marta Riera-Borrull, Anna Hernández-Aguilera, Roger Mariné-Casadó, Anna Rull, Raúl Beltrán-Debón, Fedra Luciano-Mateo, Javier A. Menéndez<sup>1</sup>, Alejandro Vazquez-Martin<sup>1</sup>, Juan J. Sirvent<sup>2</sup>, Vicente Martín-Paredero<sup>3</sup>, Angel L. Corbí<sup>4</sup>, Elena Sierra-Filardi<sup>4</sup>, Gerard Aragonès, Anabel García-Heredia, Jordi Camps, Carlos Alonso-Villaverde<sup>5</sup>, Jorge Joven\*

The sequence of main elements used in the construction of the vector is described according to the following, color-based legend. For clarity, flanking regions were also included.

```
5'homology arm 465-3467
MCS 3475-3495
UbiC promoter 3500-4709
loxP site 4724-4757
STOP cassette 4768-6101
loxP site 6102-6135
genomic fragment of CCL2 gene (frag) 6150-9056
    exon1 6468-6628
    exon2 7374-7491
    exon3 7817-8343
SV40pA 9090-9318
FRT site 9331-9378
PGK promoter 9388-9906
Neo CDS 9974-10777
Splice donor (SD) 10799-11005
Instability signal (IS) 11006-11059
FRT site 11090-11137
MCS 11209-11230
3'homology arm 11231-14260

1 AAACCGTCTA TCAGGGCGAT GGCCCACTAC GTGAACCATC ACCCTAATCA AGTTTTTTGG
61 GGTTCGAGGTG CCGTAAAGCA CTAAATCGGA ACCCTAAAGG GAGCCCCCGA TTTAGAGCTT
121 GACGGGGAAA GCCGGCGAAC GTGGCGAGAA AGGAAGGGAA GAAAGCGAAA GGAGCGGGCG
181 CTAGGGCGCT GGCAAGTGTA GCGGTCACGC TGCGCGTAAC CACCACACCC GCCGCGCTTA
241 ATGCGCCGCT ACAGGGCGCG TCCCATTCGC CATTCAGGCT GCGCAACTGT TGGGAAGGGC
301 GATCGGTGCG GGCCTCTTCG CTATTACGCC AGCTGGCGAA AGGGGGATGT GCTGCAAGGC
361 GATTAAAGTTG GGTAACGCCA GGGTTTTCCC AGTCACGACG TTGTAAAACG ACGGCCAGTG
421 AATTGTAATA CGACTACTA TAGGGCGAAT TGGGTACCGG CGCGCCTAGC GACCTAAACC
481 ATTATTAATA TCAAATTAAC CATCAAAACA CTTTCCTCTC AATATGCTGC ACACAAACCT
541 CCTCCTGGAA CCTCCTCCAT CTGGATCCTC CCAATCAAA AGTATAGGTA TTAAACATAT
601 AAGCAAGGAA GTAATGTAAA CATGACCTTG GTCACAAATA TGTCATCTAA AAACAATTTA
```

661 GTCAAGGTAT GGAGGAAATT CGAGAACCTG AATCTTTTTA AGTATTTTGA GCACAGGAAC  
721 AATTGGCAAA AGGAATCCAG GTATAGACAA AACCCAGAGC CCAGAGCTCT GGGCGAAAAA  
781 TGAGTTGCTG GTGAAGACGT TACACAAGTA ACATGAGAAA GCAGAAAATG CAGGTCATCC  
841 ACGCACCCCT GACCCAGGCC AGCAGGGCGG GCTGCAGCAT CAGTACACAG GAGAAAGATC  
901 CTTATTCTTA AGAATGAGAA AGGCAAAGGC GCCCATAGA ATAAATTAGC ATAGAAGGGG  
961 CTTTCCCAGG AGTTAAACT TTCCTTCTGA GCGATTACCT ACTAAAACCA GGGCTTTTGC  
1021 CCACTACCAT TTACCTAGGA TCTTGGCTTG CACGGATTCA TAGGGGCATA TCCCTCCCCC  
1081 TCTTCTTTAG AGTCGTTCTT AAAAGATCGC TCTCCACGCC CTAGGCAGGG AAAACGACAA  
1141 AATCTGGCTC AATTCAGGC TAGAACCTA CAAATTCAAC AGGGATATCG CAAGGATACT  
1201 GGGGCATACG CCACAGGGAG TCCAAGAATG TGAGGTGGGG GTGGCGAAGG TAATGTCTTT  
1261 GGTGTGGGAA AAGCAGCAGC CATCTGAGAT AGGAACTGGA AAACCAGAGG AGAGGCGTTC  
1321 AGGAAGATTA TGGAGGGGAG GACTGGGCCC CCACGAGCGA CCAGAGTTGT CACAAGGCCG  
1381 CAAGAACAGG GGAGGTGGGG GGCTCAGGGA CAGAAAAAAA AGTATGTGTA TTTTGAGAGC  
1441 AGGGTTGGGA GGCCTCTCCT GAAAAGGGTA TAAACGTGGA GTAGGCAATA CCCAGGCAAA  
1501 AAGGGGAGAC CAGAGTAGGG GGAGGGGAAG AGTCCTGACC CAGGGAAGAC ATTAAAAAGG  
1561 TAGTGGGGTC GACTAGATGA AGGAGAGCCT TTCTCTCTGG GCAAGAGCGG TGCAATGGTG  
1621 TGTAAAGGTA GCTGAGAAGA CGAAAAGGGC AAGCATCTTC CTGCTACCAG GCTGGGGAGG  
1681 CCCAGGCCCA CGACCCCGAG GAGAGGGAAC GCAGGGAGAC TGAGGTGACC CTTCTTTCCC  
1741 CCGGGGCCCG GTCGTGTGGT TCGGTGTCTC TTTTCTGTG GACCCTTACC TTGACCCAGG  
1801 CGCTGCCGGG GCCTGGGCCC GGGCTGCGGC GCACGGCACT CCCGGGAGGC AGCGAGACTC  
1861 GAGTTAGGCC CAACGCGGCG CCACGGCGTT TCCTGGCCGG GAATGGCCCG TACCCGTGAG  
1921 GTGGGGGTGG GGGGAGAAA AGGCGGAGCG AGCCGAGGC GGGGAGGGGG AGGGCCAGGG  
1981 GCGGAGGGGG CCGGCACTAC TGTGTTGGCG GACTGGCGGG ACTAGGGCTG CGTGAGTCTC  
2041 TGAGCGCAGC GGGCGGCGGC CGCCCTCCC CCGGCGGCGG CAGCGGCGGC AGCGGCGGCA  
2101 GCTCACTCAG CCCGCTGCCC GAGCGGAAAC GCCACTGACC GCACGGGGAT TCCCAGTGCC  
2161 GGCGCCAGGG GCACGCGGGA CACGCCCCCT CCCGCCGCGC CATTGGCCTC TCCGCCACC  
2221 GCCCCACACT TATTGGCCGG TGCGCCGCA ATCAGCGGAG GCTGCCGGGG CCGCCTAAAG  
2281 AAGAGGCTGT GCTTTGGGGC TCCGGCTCCT CAGAGAGCCT CGGCTAGGTA GGGGATCGGG  
2341 ACTCTGGCGG GAGGCGGGCT TGGTGCCTT GCGGGGATGG GCGGCCGCGG CAGGCCCTCC  
2401 GAGCGTGGTG GAGCCGTTCT GTGAGACAGC CGGTACGAG TCGTGACGCT GGAAGGGGCA  
2461 AGCGGGTGGT GGGCAGGAAT GCGGTCCGCC CTGCAGCAAC CGGAGGGGGA GGGAGAAGGG  
2521 AGCGGAAAAG TCTCCACCGG ACGCGGCCAT GGCTCGGGGG GGGGGGGGCA GCGGAGGAGC  
2581 GCTTCCGGCC GACGTCTCGT CGCTGATTGG CTCTTTTCC TCCCGCCGTG TGTGAAAACA  
2641 CAAATGGCGT GTTTTGGTTG GCGTAAGGCG CCTGTCAGTT AACGGCAGCC GGAGTGCGCA  
2701 GCCGCCGGCA GCCTCGCTCT GCCCACTGGG TGGGCGGGGA GGTAAGTGGG GTGAGGCGAG  
2761 CTGGACGTGC GGGCGCGGTC GGCCTCTGGC GGGGCGGGGG AGGGGAGGGA GGGTCAGCGA  
2821 AAGTAGCTCG CGCGCGAGCG GCCGCCACC CTCCCCTTCC TCTGGGGGAG TCGTTTTACC

2881 CGCCGCCGGC CGGGCCTCGT CGTCTGATTG GCTCTCGGGG CCCAGAAAAC TGGCCCTTGC  
2941 CATTTGGCTCG TGTTCTGTGCA AGTTGAGTCC ATCCGCCGGC CAGCGGGGGC GGCGAGGAGG  
3001 CGCTCCCAGG TTCCGGCCCT CCCCTCGGCC CCGCGCCGCA GAGTCTGGCC GCGCGCCCTT  
3061 GCGCAACGTG GCAGGAAGCG CGCGCTGGGG GCGGGGACGG GCAGTAGGGC TGAGCGGCTG  
3121 CGGGGCGGGT GCAAGCACGT TTCCGACTTG AGTTGCCTCA AGAGGGGCGT GCTGAGCCAG  
3181 ACCTCCATCG CGCACTCCGG GGAGTGGAGG GAAGGAGCGA GGGCTCAGTT GGGCTGTTTT  
3241 GGAGGCAGGA AGCACTTGCT CTCCCAAAGT CGCTCTGAGT TGTTATCAGT AAGGGAGCTG  
3301 CAGTGGAGTA GGCGGGGAGA AGGCCGCACC CTTCTCCGGA GGGGGGAGGG GAGTGTGCA  
3361 ATACCTTTCT GGGAGTTCTC TGCTGCCTCC TGGCTTCTGA GGACCGCCCT GGGCCTGGGA  
3421 GAATCCCTTC CCCCTCTTCC CTCGTGATCT GCAACTCCAG TCTTTCTGGT ACCTCTAGAC  
3481ATATGTTAAT TAAATCGATG GCCTCCGCGC CGGGTTTTGG CGCCTCCCGC GGGCGCCCCC  
3541 CTCCTCACGG CGAGCGCTGC CACGTCAGAC GAAGGGCGCA GCGAGCGTCC TGATCCTTCC  
3601 GCCCCGACGC TCAGGACAGC GGCCCGCTGC TCATAAGACT CGGCCTTAGA ACCCCAGTAT  
3661 CAGCAGAGG ACATTTTAGG ACGGGACTTG GGTGACTCTA GGGCACTGGT TTTCTTTCCA  
3721 GAGAGCGGAA CAGGCGAGGA AAAGTAGTCC CTTCTCGGCG ATTCTGCGGA GGGATCTCCG  
3781 TGGGGCGGTG AACGCCGATG ATTATATAAG GACGCGCCGG GTGTGGCACA GCTAGTTCCG  
3841 TCGCAGCCGG GATTTGGGTC GCGGTTCTTG TTTGTGGATC GCTGTGATCG TCACTTGGTG  
3901 AGTAGCGGGC TGCTGGGCTG GCCGGGGCTT TCGTGGCCGC CGGGCCGCTC GGTGGGACGG  
3961 AAGCGTGTGG AGAGACCGCC AAGGGCTGTA GTCTGGGTCC GCGAGCAAGG TTGCCCTGAA  
4021 CTGGGGGTTG GGGGGAGCGC AGCAAAATGG CGGCTGTTCC CGAGTCTTGA ATGGAAGACG  
4081 CTTGTGAGGC GGGCTGTGAG GTCGTTGAAA CAAGGTGGGG GGCATGGTGG GCGGCAAGAA  
4141 CCCAAGGTCT TGAGGCCTTC GCTAATGCGG GAAAGCTCTT ATTCGGGTGA GATGGGCTGG  
4201 GGCACCATCT GGGGACCTG ACGTGAAGTT TGTCACGTAC TGGAGAACTC GGTTTGTCTG  
4261 CTGTTGCGGG GCGGCAGTT ATGGCGGTGC CGTTGGGCAG TGCACCCGTA CCTTTGGGAG  
4321 CGCGCGCCCT CGTCGTGTCG TGACGTCACC CGTTCTGTTG GCTTATAATG CAGGGTGGGG  
4381 CCACCTGCCG GTAGGTGTGC GGTAGGCTTT TCTCCGTCGC AGGACGCAGG GTTCGGGCCT  
4441 AGGGTAGGCT CTCCTGAATC GACAGGCGCC GGACCTCTGG TGAGGGGAGG GATAAGTGAG  
4501 GCGTCAGTTT CTTTGGTCGG TTTTATGTAC CTATCTTCTT AAGTAGCTGA AGCTCCGGTT  
4561 TTGAACATAG CGCTCGGGT TGGCGAGTGT GTTTTGTGAA GTTTTTTAGG CACCTTTTGA  
4621 AATGTAATCA TTTGGGTCAA TATGTAATTT TCAGTGTTAG ACTAGTAAAT TGTCCGCTAA  
4681 ATTCTGGCCG TTTTGGCTT TTTTGTTAGA CGCCACCATG CATATAACTT CGTATAGCAT  
4741 ACATTATACG AAGTTATGGC GCGCCGATCC TCGGGGACAC CAAATATGGC GATCTCGGCC  
4801 TTTTCGTTTC TTGGAGCTGG GACATGTTTG CCATCGATCC ATCTACCACC AGAACGGCCG

4861 TTAGATCTGC TGCCACCGTT GTTTCACCG AAGAAACCAC  
CGTTGCCGTA ACCACCACGA

4921 CGGTGTTGTC TAAAGAAGCT GCCACCGCCA CGGCCACCGT TGTAGCCGCC GTTGTGTTA

4981 TTGTAGCTGC TACTGTTATT TCTGGCACTT CTTGGTTTTC CTCTTAAGTG AGGAGGAACA

5041 TAACCATTCT CGTTGTTGTC GTTGATGCTT AAATTTTGCA CTTGTTGCT CAGTTCAGCC

5101 ATAATATGAA ATGCTTTTCT TGTGTTCTT ACGGAATACC ACTTGCCACC TATCACCACA

## 5161 ACTAACTTTT TCCCGTTCCT CCATCTCTTT TATATTTTTT TTCTCGAGGG ATCTTTGTGA

5221 AGGAACCTTA CTTCTGTGGT GTGACATAAT TGGACAACT ACCTACAGAG ATTTAAAGCT

5281 CTAAGGTAA TATAAAATTT TTAAGTGAT AATGTGTTAA ACTACTGATT CTAATTGTTT

5341 GTGTATTTTA GATTCCAACC TATGGAACGT ATGAATGGGA GCAGTGGTGG AATGCCTTTA

5401 ATGAGGAAAA CCGTTTTGTC TCAGAAGAAA TGCCATCTAG TGATGATGAG GCTACTGCTG

5461 ACTCTCAACA TTCTACTCCT CCAAAAAAGA AGAGAAAGGT AGAAGACCCC AAGGACTTTC

5521 CTTCAGAATT GCTAAGTTTT TTGAGTCATG CTGTGTTTAG TAATAGAACT CTTGCTTGCT

5581 TTGCTATTTA CACCACAAAG GAAAAAGCTG CACTGCTATA CAAGAAAATT ATGGAAAAAT

5641 ATTCTGTAAC CTTTATAAGT AGGCATAACA GTTATAATCA TAACATACTG TTTTTCTTA

## 5701 CTCCACACAG GCATAGAGTG TCTGCTATTA ATAACTATGC TCAAAAATTG TGTACCTTTA

5761 GCTTTTTAAT TTGTAAAGGG GTTAATAAGG AATATTTGAT GTATAGTGCC TTGACTAGAG

5821 ATCATAATCA GCCATACCAC ATTTGTAGAG GTTTTACTTG CTTTAAAAA CCTCCACAC

5881 CTCCCCCTGA ACCTGAAACA TAAATGAAT GCAATTGTTG TTGTTAACTT GTTTATTGCA

5941 GCTTATAATG GTTACAAATA AAGCAATAGC ATCACAAATT TCACAAATAA AGCATTTTTT

6001 TCACTGCATT CTAGTTGTGG TTTGTCCAAA CTCATCAATG TATCTTATCA TGTCTGGATC

6061 TGACATGGTA AGTAAGCTTG GGCTGCAGGT CGAGGGACCT AATAACTTCG TATAGCATAC

6121 ATTATACGAA GTTATGCGGC CGCGAATTCA AAGCAGAGCC ACTCCATTCA CACTTGIGGT

6181 CACAGTAGTA CAATTACTGC CAATTCTTCC CTCTTTCCCC CCCCCCCCC CTACTCCCTG

6241 CGCAGCTTCA TTTGCTCCCA GGAGTGGCTA GAAAAATACC AAATTCCAAC CCACAGTTTC

6301 TCTCTTCCAC TTCTGGAAA CACCCGAGGG CTCTGCACTT ACTCAGCGGA TTCAACTTCC

6361 ACTTTCATC ACTTATCCAG GGTGATGCTA CTCCTTGGCA CCAAGCACCC TGCCTGACTC

6421 CACCCCCCTG GCTTACAATA AAAGGCTGCC TCAGAGCAGC CAGAAGTGCA GAGAGCCAGA

## 6481 CGGGAGGAAG GCCAGCCCAG CACCAGCACC AGCCAACTCT CACTGAAGCC AGCTCTCTCT

6541 TCCTCCACCA CCATGCAGGT CCCTGTCATG CTTCTGGGCC TGCTGTTTAC AGTTGCCGGC

6601 TGGAGCATCC ACGTGTTGGC TCAGCCAGGT GAGACCCCC CAGCTCCCTT CCCAGCATAT

6661 CACCCCATTT TTGAATTGTC GTGGATTGTG ATAGCATAGT CTCACATGGT CAGGTACTTT

6721 TTTTTTTTTC TTTAACCAAG ATAAGGAGCA TAAAGAAGGA AGGACAAAGA GCCAACCCAA

6781 TTACAAGATT GCTTCTGGAA AGCAACTAGA ATTTTAATTG TTAGATCTAA ATTTGGAATC

6841 ACACCTTCAT ATAGTTCCTG TTCCAGTTAC TTCCCTCAGT ATTTGGGAAC CTGGGTGATC

6901 AAACAGAGGC TTGGTTGGT GCCTTTTTC AGATAGAGGA GAAAGGGGAA GAGATCCAAG

6961 ATCCGAGCTG TGTTTCACCC AGCCCTGCTT CCAGAGATAG CAGCTTAGCG GAGGTGGTTG

7021 GGATCAGAGA TACTCATGAT TTGATTTTTT TTTTTTTTTT TTTTTTTTTT TTTTTTTTGC

7081 AGCCTACAGT AATGTACTCA GGTAACTCTC TCAGGTCATA GTAATTGAC TTCTAACTCC

7141 CCCAAATGAC AGTCCCCAGA GTCACATAGT TTTAATGGCA TCCCTCTACC CAAGACTGTG

7201 AGCCTACTTT AAGCTGCAA TAACTGAGTC TGTGTCAAA GATCACATCC CAGATCTGAT

7261 GTATTGGCAT TTATATCCCA TCCTGCTGAA ACTGCCTTCT CCCCCTGGTC CTCTCTTCT

7321 CTAAGGTCAG AAGCATCTTT CCTGTCCTAA TGTGCTTCTC TTTTACTCTC CAGATGCAGT

7381 TAACGCCCCA CTCACCTGCT GCTACTCATT CACCAGCAAG ATGATCCCAA TGAGTAGGCT

7441 GGAGAGCTAC AAGAGGATCA CCAGCAGCAG GTGTCCCAA GAAGCTGTAG TGTGAGTTAC

7501 ATACCCCGGC CCTCCCTGGT CCAAAGGTTT TTCCTTAAGA ACAAGGGATG GTCCTCATAT

7561 ACTTATAGTC AGTCACACAC TCAGATCCAA TGGGGAACC AAGGCCAAGA AGGCAAAGGC

7621 AGTTCTCAAC AGCATTGTCT CTATGGCTGC TGTTCAGGCC CTTTCTACTC CACAAGCTTA

7681 TCTTAGAAAA CCTGCAGGAG AAGCAGGTCA CTTTGAGTCC CCTTTTCTA CTGCCCCCTC

7741 CCCGCTGAGC TCTACACAGC CCCTCCATGT ATACCAGACT GAACTTCATC TAACAGTGTC

7801 TTTTCTCTTC CCACAGTTTT GTCACCAAGC TCAAGAGAGA GGTCTGTGCT GACCCCAAGA

7861 AGGAATGGGT CCAGACATAC ATTAAAAACC TGGATCGGAA CCAAATGAGA TCAGAACCTA

7921 CAACTTTATT TAAACTGCA TCTGCCCTAA GGTCTTCAGC ACCTTTGAAT GTGAAGTTGA

7981 CCCGTAAATC TGAAGCTAAT GCATCCACTA CCTTTCCAC AACCACCTCA AGCACTTCTG

8041 TAGGAGTGAC CAGTGTGACA GTGAAGTAGT GTGACTCGGA CTGTGATGCC TTAATTAATA

8101 TTAAACTTAT TTAAGTTATG GATGTTATGG TATTCCTTT CATGAATACT AAAATTTCTT

8161 AAATGCAAGG TGTGGATCCA TTTTCCCTC TCTGTGAATC CAGATTCAAC ACTTCAATG

8221 TATGAGAGAT GAATTTTGTA AAGATGAATG GTTAACTTT GTGTTTGAGA TTCCAAGGTA

8281 TTGTTTAAAA TATTATTATG GATATTCCTT ATTATTAAAA GAAATATATT ATTTTGTAC

8341 ACCAGTCTGA CTTTGAGTGT TTTCTTGAGG GAAACTGCAA AGCTGAGAGT ATATAAGCTT

8401 GGAGAGCAAC ACAGGTTGGG ACACATATTG TGGGGGAACA GGAGAGTGAA TGGCCCACTC

8461 TTTTGTATTG AATGGTCTTA TCTGAGTGTC ATAGACTCTT CAAGATGGGG CCCAGTCAGG

8521 GATGCTAGTA CCATTGTTTT GGTCCCTAGC ATTGCTTCTC AGATACATGC TCAACAAAAG

8581 CCCCAGTCTT TCCCAGTCAC ATGTCCTAGT TGCCCTTTAA CTGGGATACA TCACTTCCAT

8641 CTACAGCTCT GCAATTTATA ATTCTCTAAC TGCATAGGTA GTTCAGACAG TGGAGAACAG

8701 ACGGGAGACT TAACCATCTT CTATAGGAAG GTTATGGTAA TGCTTCCTAG AGAGAGGAAG

8761 ACATGAAGTT ATCCTTGATA ATGGTTAGTT TTATAGGAAA AAAACACAA AAGCATTAA

8821 GAAAGTGGT AGGTGGGGGA AATTATCCAA AAATAGAAAT GAAATGGTG TGTACATTAA

8881 ACGGGGAAGA GCGAGGGAAC CCATCCGATG GAGCTGCATG TATATCAAGA GATGGGGATT

8941 TTTCAAGAGG AAGCTCAATA CAGGGTTTGG AATAGGAAGG TGAGAACATG GTATTCCCTC

9001 GGACCTATAA TTAAAGGAT AAGTTGAAAC TCTTCGGTCC AATAAGAGG GAGGGAGAAT

9061 TCAGATCTGG TACCGATATC AAGCTTAACT GATCATAATC AGCCATACCA CATTTGTAGA

9121 GGTTTACTT GCTTTAAAAA ACCTCCACAC CCTCCCCCTG AACCTGAAAC ATAAAAATGAA

9181 TGCAATTGTT GTTGTTAACT TGTATTATGC AGCTTATAAT GGTTACAAAT AAAGCAATAG

9241 CATCACAAAT TTCACAAATA AAGCATTTTT TCTACTGCAT TCTAGTTGTG GTTTGTCCAA

9301 ACTCATCAAT GTATCTTAAC GCTTAATTAA GAAGTTCCTA TTCCGAAGTT CCTATTCTCT

9361 AGTAAGTATA GGAACCTTCTG GCGAATTAAT TCTACCGGGT AGGGGAGGCG CTTTTCCCAA

9421 GGCAGTCTGG AGCATGCGCT TTAGCAGCCC CGCTGGGCAC TTGGCGCTAC ACAAGTGGCC

9481 TCTGGCCTCG CACACATTCC ACATCCACCG GTAGGCGCCA ACCGGCTCCG TTTTGTGTG

9541 GCCCCCTTCGC GCCACCTTCT ACTCCTCCCC TAGTCAGGAA GTTCCCCCCC GCCCCGCAGC

9601 TCGCGTCGTG CAGGACGTGA CAAATGGAAG TAGCACGTCT CACTAGTCTC GTGCAGATGG

9661 ACAGCACCGC TGAGCAATGG AAGCGGGTAG GCCTTTGGGG CAGCGGCCAA TAGCAGCTTT

9721 GCTCCTTCGC TTTCTGGGCT CAGAGGCTGG GAAGGGGTGG GTCCGGGGGC GGGCTCAGGG

9781 GCGGGCTCAG GGGCGGGGCG GCGCCCCGAA GGTCTCCGG AGGCCCGGCA TTCTGCACGC

9841 TTCAAAAGCG CACGTCTGCC GCGCTGTTCT CCTCTTCCTC ATCTCCGGGC CTTTCGACCT

9901 GCAGCCTGTT GACAATTAAT CATCGGCATA GTATATCGGC ATAGTATAAT ACGACAAGGT

9961 GAGGAACTAA ACCATGGGAT CGGCCATTGA ACAAGATGGA TTGCACGCAG GTTCTCCGGC

10021 CGCTTGGGTG GAGAGGCTAT TCGGCTATGA CTGGGCACAA CAGACAATCG GCTGCTCTGA

10081 TGCCGCCGTG TTCCGGCTGT CAGCGCAGGG GCGCCCGGTT CTTTTTGTCA AGACCGACCT

10141 GTCCGGTGCC CTGAATGAAC TGCAGGACGA GGCAGCGCGG CTATCGTGGC TGGCCACGAC

10201 GGGCGTTCCT TGCGCAGCTG TGCTCGACGT TGTCACTGAA GCGGGAAGGG ACTGGCTGCT

10261 ATTGGGCGAA GTGCCGGGGC AGGATCTCCT GTCATCTCAC CTGCTCCTG CCGAGAAAGT

10321 ATCCATCATG GCTGATGCAA TCGGCGGGCT GCATACGCTT GATCCGGCTA CCTGCCATT

10381 CGACCACCAA GCGAAACATC GCATCGAGCG AGCACGTACT CGGATGGAAG CCGGTCTTGT

10441 CGATCAGGAT GATCTGGACG AAGAGCATCA GGGGCTCGCG CCAGCCGAAC TGTTCCGCCAG

10501 GCTCAAGGCG CGCATGCCCG ACGGCGATGA TCTCGTCGTG ACCCATGGCG ATGCCTGCTT

10561 GCCGAATATC ATGGTGGAAT ATGGCCGCTT TTCTGGATTC ATCGACTGTG GCCGGCTGGG

10621 TGTGGCGGAC CGCTATCAGG ACATAGCGTT GGCTACCCGT GATATTGCTG AAGAGCTTGG

10681 CGGCGAATGG GCTGACCGCT TCCTCGTGCT TTACGGTATC GCCGCTCCCG ATTCGCAGCG

10741 CATCGCCTTC TATCGCCTTC TTGACGAGTT CTTCTGAGGC CGGCCCCACG CGTCCACCTT

10801 TGTTGTTGGA TATGCCCTTG ACTATAATGA GTACTTCAGG GATTTGAATG TAAGTAATGC

10861 TTTTTTTTTT CTCGCTCTCA TTTTCAAAA ACCCACATAA AAATTGAGGA AAGGGAAGAA

10921 TTGTTTCTC CTCCAGCAC CTCGTAATTT GACCCGACTG ATGGTTCCCA TTAGTCACAT

10981 AAAGCTGTAG TCAAGTACAG ACGTCAGTAA TATTTATATA TTTATATTTT TAAAATATTT

11041 ATTTATTTAT TTATTTAAGT TAATTAGTGA AGGGCGAGCT TGAGGATCTG AAGTTCCTAT

11101 TCCGAAGTTC CTATTCTCTA GTAAGTATAG GAACTTCGGA TCGTTGAAGA AGGAGGTGGG

11161 ATGCTTAATT AAGCTTGTCG ACTCTAGATT GCGGCCGCGG CGGCCCAT**CG ATGAATTCGA**

11221 **TATCGGCCGG**CGAAGATGG GCGGGAGTCT TCTGGGCAGG CTTAAAGGCT AACCTGGTGT

11281 GTGGGCGTTG TCCTGCAGGG GAATTGAACA GGTGTAAAT TGGAGGGACA AGACTTCCCA

11341 CAGATTTTCG GTTTGTGCGG GAAGTTTTTT AATAGGGGCA AATAAGGAAA ATGGGAGGAT

11401 AGGTAGTCAT CTGGGGTTTT ATGCAGCAAA ACTACAGGTT ATTATTGCTT GTGATCCGCC



11461 TCGGAGTATT TTCCATCGAG GTAGATTAAA GACATGCTCA CCCGAGTTTT ATACTCTCCT  
11521 GCTTGAGATC CTTACTACAG TATGAAATTA CAGTGTGCGG AGTTAGACTA TGTAAGCAGA  
11581 ATTTTAATCA TTTTAAAGA GCCCAGTACT TCATATCCAT TTCTCCCGCT CCTTCTGCAG  
11641 CCTTATCAAA AGGTATTTTA GAACACTCAT TTTAGCCCCA TTTTCATTTA TTATACTGGC  
11701 TTATCCAACC CCTAGACAGA GCATTGGCAT TTTCCCTTTC CTGATCTTAG AAGTCTGATG  
11761 ACTCATGAAA CCAGACAGAT TAGTTACATA CACCACAAAT CGAGGCTGTA GCTGGGGCCT  
11821 CAACACTGCA GTTCTTTTAT AACTCCTTAG TACACTTTTT GTTGATCCTT TGCCTTGATC  
11881 CTTAATTTTC AGTGTCTATC ACCTCTCCCG TCAGGTGGTG TTCCACATTT GGGCCTATTC  
11941 TCAGTCCAGG GAGTTTTACA ACAATAGATG TATTGAGAAT CCAACCTAAA GCTTAACTTT  
12001 CCACTCCCAT GAATGCCTCT CTCCTTTTTC TCCATTTATA AACTGAGCTA TTAACCATTA  
12061 ATGGTTTCCA GGTGGATGTC TCCTCCCCCA ATATTACCTG ATGTATCTTA CATATTGCCA  
12121 GGCTGATATT TTAAGACATT AAAAGGTATA TTTCATTATT GAGCCACATG GTATTGATTA  
12181 CTGCTTACTA AAATTTTGTC ATTGTACACA TCTGTAAAAG GTGGTTCCTT TGGAATGCA  
12241 AAGTTCAGGT GTTTGTTGTC TTTCTGACC TAAGGTCTTG TGAGCTTGTA TTTTTCTAT  
12301 TTAAGCAGTG CTTTCTCTTG GACTGGCTTG ACTCATGGCA TTCTACACGT TATTGCTGGT  
12361 CTAAATGTGA TTTTGCCAAG CTTCTTCAGG ACCTATAATT TTGCTTGACT TGTAGCCAAA  
12421 CACAAGTAAA ATGATTAAGC AACAAATGTA TTTGTGAAGC TTGGTTTTTA GGTGTTGTG  
12481 TTGTGTGTGC TTGTGCTCTA TAATAATACT ATCCAGGGGC TGGAGAGGTG GCTCGGAGTT  
12541 CAAGAGCACA GACTGCTCTT CCAGAAGTCC TGAGTTCAAT TCCCAGCAAC CACATGGTGG  
12601 CTCACAACCA TCTGTAATGG GATCTGATGC CCTCTTCTGG TGTGTCTGAA GACCACAAGT  
12661 GTATTCACAT TAAATAAATA AATCCTCCTT CTTCTTCTTT TTTTTTTTTT TAAAGAGAAT  
12721 ACTGTCTCCA GTAGAATTTA CTGAAGTAAT GAAATACTTT GTGTTTGTTT CAATATGGTA  
12781 GCCAATAATC AAATTACTCT TTAAGCACTG GAAATGTTAC CAAGGAAC TAATTTTATTT  
12841 GAAGTGTAAC TGTGGACAGA GGAGCCATAA CTGCAGACTT GTGGGATACA GAAGACCAAT  
12901 GCAGACTTTA ATGTCTTTTC TCTTACACTA AGCAATAAAG AAATAAAAAAT TGAACCTCTA  
12961 GTATCCTATT TGTTTAAACT GCTAGCTTTA CTTAACTTTT GTGCTTCATC TATACAAAGC  
13021 TGAAAGCTAA GTCTGCAGCC ATTACTAAAC ATGAAAGCAA GTAATGATAA TTTTGGATTT  
13081 CAAAAATGTA GGGCCAGAGT TTAGCCAGCC AGTGGTGGTG CTGTCCTTTA TGCCTTTAAT  
13141 CCCAGCACTC TGGAGGCAGA GACAGGCAGA TCTCTGAGTT TGAGCCCAGC CTGGTCTACA  
13201 CATCAAGTTC TATCTAGGAT AGCCAGGAAT ACACACAGAA ACCCTGTTGG GGAGGGGGGC  
13261 TCTGAGATTT CATAAAATTA TAATTGAAGC ATTCCCTAAT GAGCCACTAT GGATGTGGCT  
13321 AAATCCGTCT ACCTTTCTGA TGAGATTTGG GTATTATTTT TTCTGTCTCT GCTGTTGGTT  
13381 GGGTCTTTTG AACTGTGGG CTTTCTTTAA AGCCTCCTTC CTGCCATGTG GTCTCTTGTT  
13441 TGCTACTAAC TTCCCATGGC TTAAATGGCA TGGCTTTTTG CCTTCTAAGG GCAGCTGCTG  
13501 AGATTGTCAG CCTGATTTCC AGGGTGGGGT TGGGAAATCT TTCAAACACT AAAATGTCC  
13561 TTTAATTTTT TTTTAAAAA ATGGGTATTA TAATAAACCT CATAAAATAG TTATGAGGAG  
13621 TGAGGTGGAC TAATATTAAA TGAGTCCCTC CCCTATAAAA GAGCTATTAA GGCTTTTTGT

13681 CTTATACTTA ACTTTTTTTT TAAATGTGGT ATCTTTAGAA CCAAGGGTCT TAGAGTTTTA  
13741 GTATACAGAA ACTGTTGCAT CGCTTAATCA GATTTTCTAG TTTCAAATCC AGAGAATCCA  
13801 AATTCTTCAC AGCCAAAGTC AAATTAAGAA TTTCTGACTT TTAATGTAA TTTGCTTACT  
13861 GTGAATATAA AAATGATAGC TTTTCCTGAG GCAGGGTCTC ACTATGTATC TCTGCCTGAT  
13921 CTGCAACAAG ATATGTAGAC TAAAGTTCTG CCTGCTTTTG TCTCCTGAAT ACTAAGGTTA  
13981 AAATGTAGTA ATACTTTTGG AACTTGCAGG TCAGATTCTT TTATAGGGGA CACACTAAGG  
14041 GAGCTTGGGT GATAGTTGGT AAAATGTGTT TCAAGTGATG AAAACTTGAA TTATTATCAC  
14101 CGCAACCTAC TTTTAAAAA AAAAGCCAG GCCTGTTAGA GCATGCTTAA GGGATCCCTA  
14161 GGACTTGCTG AGCACACAAG AGTAGTTACT TGGCAGGCTC CTGGTGAGAG CATATTTCAA  
14221 AAAACAAGGC AGACAACCAA GAAACTACAG TTAAGGCCGG CCGCGGTGGA GCTCCAGCTT  
14281 TTGTTC CCTT TAGTGAGGGT TAATTTTCGAG CTTGGCGTAA TCATGGTCAT AGCTGTTTCC  
14341 TGTGTGAAAT TGTATCCGC TCACAATTC ACACAACATA CGAGCCGGAA GCATAAAGTG  
14401 TAAAGCCTGG GGTGCCTAAT GAGTGAGCTA ACTCACATTA ATTGCGTTGC GCTCACTGCC  
14461 CGCTTTCAG TCGGAAACC TGTCGTGCCA GCTGCATTAA TGAATCGGCC AACGCGCGGG  
14521 GAGAGGCGGT TTGCGTATTG GCGCTCTTC CGCTTCCTCG CTCACTGACT CGCTGCGCTC  
14581 GGTGTTTCGG CTGCGGCGAG CGGTATCAGC TCACTCAAAG GCGGTAATAC GGTATCCAC  
14641 AGAATCAGGG GATAACGCAG GAAAGAACAT GTGAGCAAAA GGCCAGCAAA AGGCCAGGAA  
14701 CCGTAAAAAG GCCGCGTTGC TGGCGTTTTT CCATAGGCTC CGCCCCCTG ACGAGCATCA  
14761 CAAAAATCGA CGCTCAAGTC AGAGGTGGCG AAACCCGACA GGA CTATAAA GATACCAGGC  
14821 GTTTC C C C C C T GGAAGCTCCC TCGTGCCTC TCCTGTTCCG ACCCTGCCGC TTACCGGATA  
14881 CCTGTCCGCC TTTCTCCCTT CGGGAAGCGT GCGCCTTTCT CATAGCTCAC GCTGTAGGTA  
14941 TCTCAGTTTC GTGTAGGTCG TTCGCTCCAA GCTGGGCTGT GTGCACGAAC CCCCCGTTCA  
15001 GCCCCACCGC TGCGCCTTAT CCGGTAAC TA TCGTCTTGAG TCCAACCCGG TAAGACACGA  
15061 CTTATCGCCA CTGGCAGCAG CCACTGGTAA CAGGATTAGC AGAGCGAGGT ATGTAGGCGG  
15121 TGCTACAGAG TTCTTGAAGT GGTGGCTTAA CTACGGCTAC ACTAGAAGGA CAGTATTTGG  
15181 TATCTGCGCT CTGCTGAAGC CAGTTACCTT CGAAAAAGA GTTGGTAGCT CTTGATCCGG  
15241 CAAACAAACC ACCGCTGGTA GCGGTGGTTT TTTTGTGTC AAGCAGCAGA TTACGCGCAG  
15301 AAAAAAAGGA TCTCAAGAAG ATCCTTTGAT CTTTCTACG GGGTCTGACG CTCAGTGGAA  
15361 CGAAACTCA CGTTAAGGGA TTTTGGTCAT GAGATTATCA AAAAGGATCT TCACCTAGAT  
15421 CCTTTTAAAT TAAAAATGAA GTTTTAAATC AATCTAAAGT ATATATGAGT AA ACTTGGTC  
15481 TGACAGTTAC CAATGCTTAA TCAGTGAGGC ACCTATCTCA GCGATCTGTC TATTTCTGTC  
15541 ATCCATAGTT GCCTGACTCC CCGTCGTGTA GATAACTACG ATACGGGAGG GCTTACCATC  
15601 TGGCCCCAGT GCTGCAATGA TACCGCGAGA CCCACGCTCA CCGGCTCCAG ATTTATCAGC  
15661 AATAAAC CAG CCAGCCGGAA GGGCCGAGCG CAGAAGTGGT CCTGCAACTT TATCCGCCTC  
15721 CATCCAGTCT ATTAATTGTT GCCGGGAAGC TAGAGTAAGT AGTTCGCCAG TTAATAGTTT  
15781 GCGCAACGTT GTTGCCATTG CTACAGGCAT CGTGGTGTCA CGCTCGTCGT TTGGTATGGC  
15841 TTCATT CAGC TCCGGTTCCC AACGATCAAG GCGAGTTACA TGATCCCCCA TGTTGTGCAA

```

15901 AAAAGCGGTT AGCTCCTTCG GTCCTCCGAT CGTTGTCAGA AGTAAGTTGG CCGCAGTGTT
15961 ATCACTCATG GTTATGGCAG CACTGCATAA TTCTCTTACT GTCATGCCAT CCGTAAGATG
16021 CTTTCTCTGT ACTGGTGAGT ACTCAACCAA GTCATTCTGA GAATAGTGTA TCGGCGGACC
16081 GAGTTGCTCT TGCCCGGCGT CAATACGGGA TAATACCGCG CCACATAGCA GAACTTTAAA
16141 AGTGCTCATC ATTGGAAAAC GTTCTTCGGG GCGAAAAC TCAGGATCT TACCGCTGTT
16201 GAGATCCAGT TCGATGTAAC CCACTCGTGC ACCCAACTGA TCTTCAGCAT CTTTACTTT
16261 CACCAGCGTT TCTGGGTGAG CAAAAACAGG AAGGCAAAAT GCCGCAAAA AGGGAATAAG
16321 GGCGACACGG AAATGTTGAA TACTCATACT CTCCTTTTT CAATATTATT GAAGCATTTA
16381 TCAGGGTTAT TGTCTCATGA GCGGATACAT ATTTGAATGT ATTTAGAAAA ATAAACAAAT
16441 AGGGGTTCCG CGCACATTTC CCCGAAAAGT GCCACCTAAA TTGTAAGCGT TAATATTTTG
16501 TTAAATTCG CGTTAAATTT TTGTTAAATC AGCTCATTTT TTAACCAATA GGCCGAAATC
16561 GGCAAAATCC CTGTTTAAAC TCGCGACGCG TTATAAATCA AAAGAATAGA CCGAGATAGG

```

**Supplementary material S3, details on the construct design, corresponding to the manuscript:**

## **Ubiquitous transgenic overexpression of C-C chemokine ligand 2: a model to assess the combined effect of high energy intake and continuous low-grade inflammation?**

Esther Rodríguez-Gallego, Marta Riera-Borrull, Anna Hernández-Aguilera, Roger Mariné-Casadó, Anna Rull, Raúl Beltrán-Debón, Fedra Luciano-Mateo, Javier A. Menéndez<sup>1</sup>, Alejandro Vazquez-Martin<sup>1</sup>, Juan J. Sirvent<sup>2</sup>, Vicente Martín-Paredero<sup>3</sup>, Angel L. Corbí<sup>4</sup>, Elena Sierra-Filardi<sup>4</sup>, Gerard Aragonès, Anabel García-Heredia, Jordi Camps, Carlos Alonso-Villaverde<sup>5</sup>, Jorge Joven\*

The Knock-in Construct Design, from plasmid to electroporation

### **1. Overview**

#### **1.1 Vector backbone**

The following plasmid (named *Ubi-Neo*) was used for construction of the *targeting vector*.

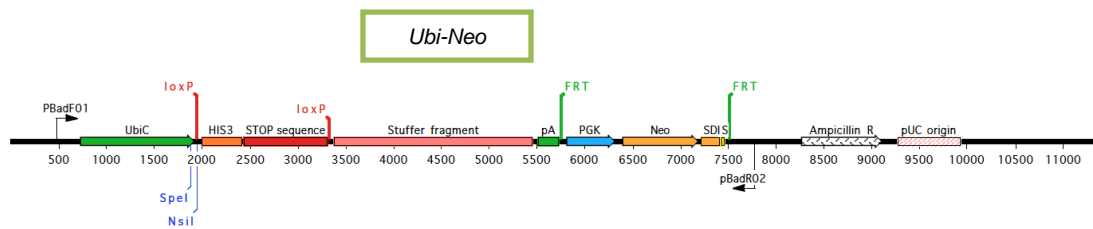

## 1.2 Construction fragments

Named *frag arm*, contained the genomic fragment of the gene to be introduced (*Ccl2*).

## 2. *frag arm* (Generation, Diagnostics and Sequencing)

### 2.1 Production

Using the following primers, the genomic fragment of *Ccl2* gene was amplified by PCR.

Template: C57BL/6 genomic DNA

P\_01 5' AGAATTCAAAGCAGAGCCACTCCATTACAC

*EcoRI* Homology

P\_02 5' TGAATTCTCCCTCCCTCTTTATTGGACCGAAG

*EcoRI* Homology

Product: 2921 bp

### 2.2 Cloning into pPCR

#### a) Sequencing with PBadF01 or PBadR02

The PCR product was cloned into pPCR and screened by sequencing to confirm clones with the correct insert.

*frag arm*

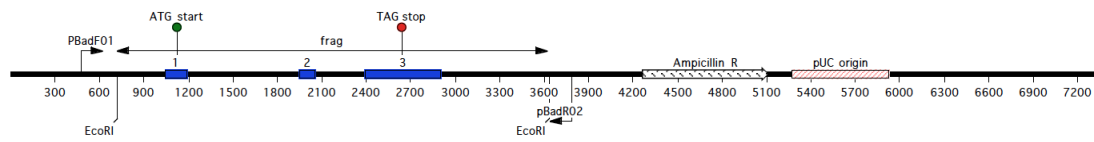

## b) Full Sequencing

Once end sequencing identified clones, a full sequence was completed using the following primers.

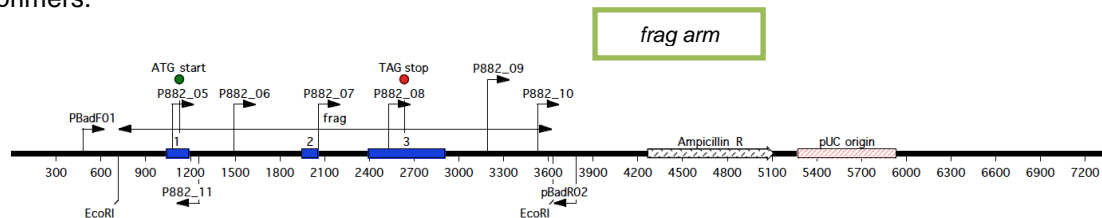

## 2.3 Cloning into the targeting vector

### a) Restriction enzyme digest for cloning

Both *frag arm* vector (containing *Ccl2* gene) and the *Ubi-Neo* vector, were digested with *EcoRI* for cloning *Ccl2* gene into *Ubi-Neo* vector (just where the *Stuffer fragment* was placed).

The resulting vector was named *Ubi-frag-Neo*

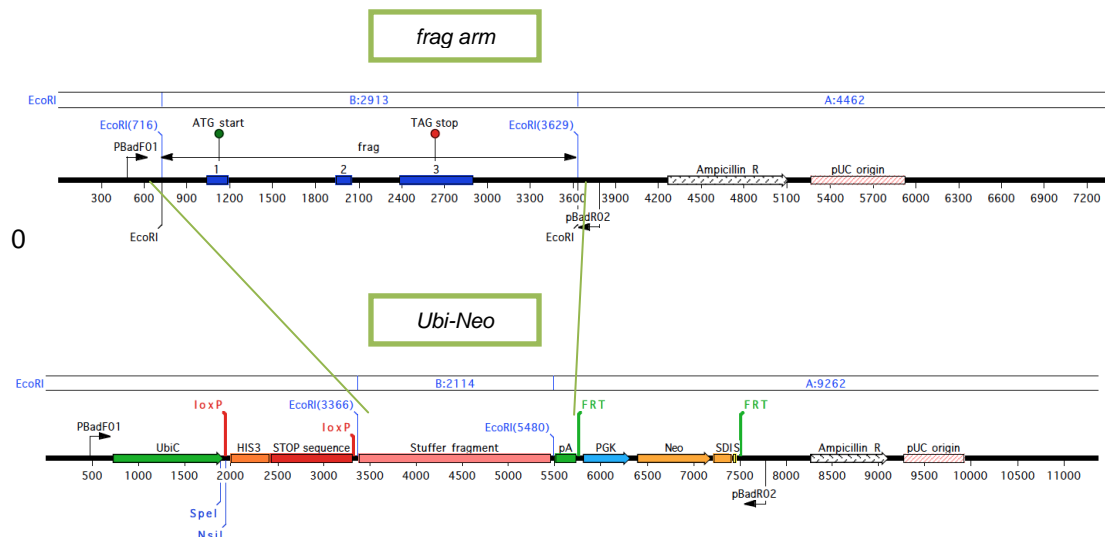

### b) Screen by Sequencing

Clones containing the insert could be screened by end sequencing with P335\_11 and PNeoR10 primers:

*Ubi-frag-Neo*

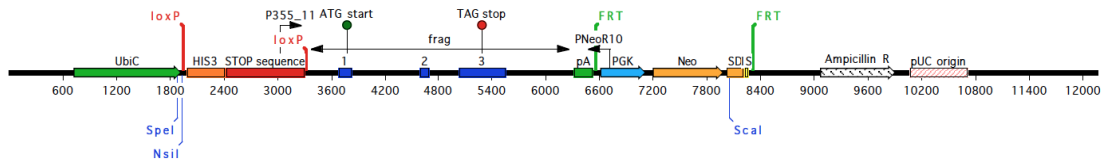

### 3. Cloning into the ROSA 26 vector

#### 3.1 Cloning into the targeting vector

##### a) Restriction enzyme digest for cloning

Clal restriction enzyme was used for cloning the constructed fragment (*Ubi-frag-Neo*) into the *ROSA26 vector* (which contained homologous sequences to ROSA26).

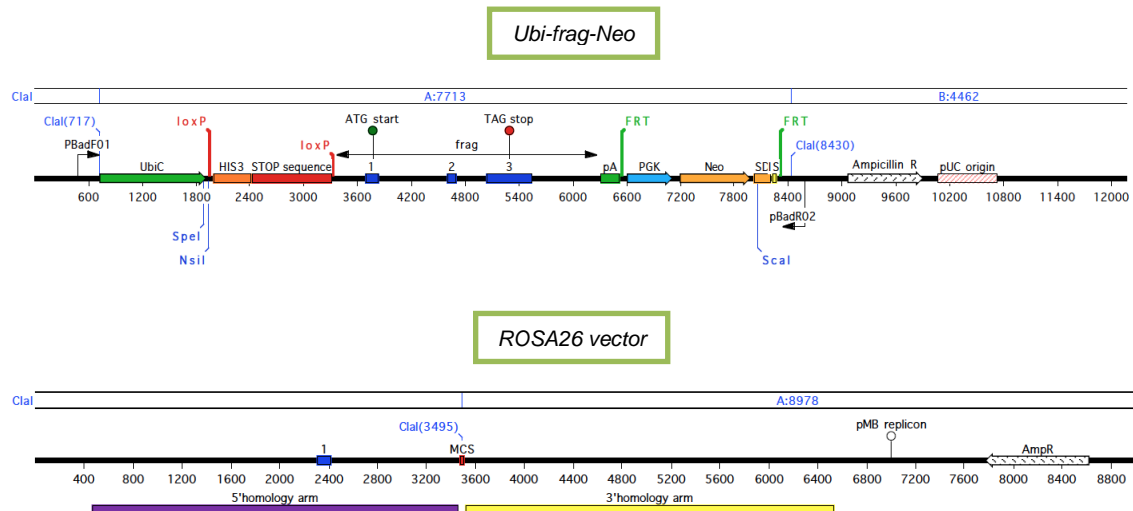

##### b) Screen by Sequencing

Clones that contained the insert (the *targeting vector*), were screened by end sequencing with the following primers

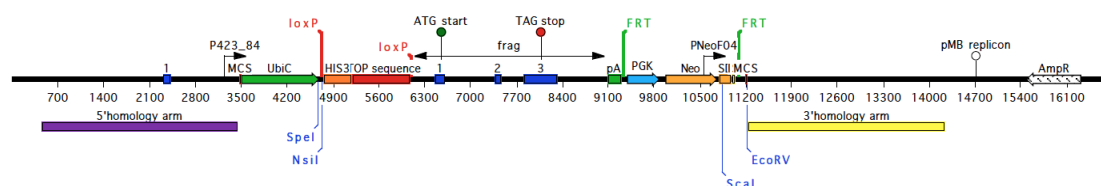



## 4. Complete Targeting Vector

### 4.1 Final sequencing

To assess the *targeting vector* integrity, final sequencing was performed using the primers identified in the following graphic:

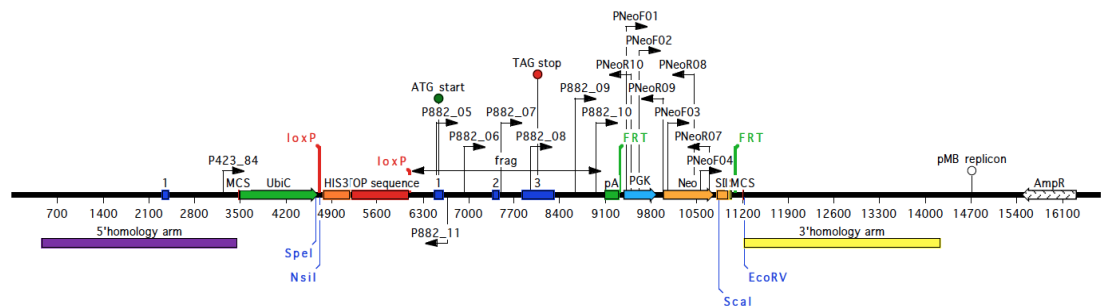

### 4.2 Restriction enzyme digest for Quality Control

*Targeting vector* was digested with several restriction enzymes as quality control strategy:

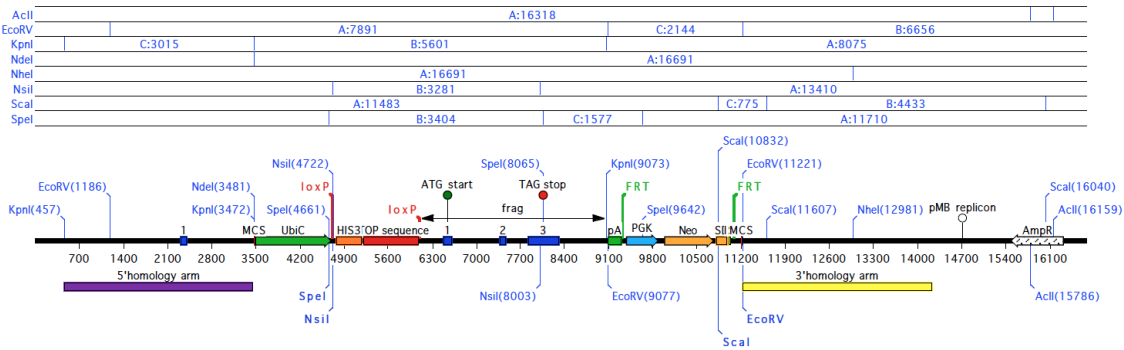

### 4.3 Restriction enzyme digest for electroporation

Finally, *targeting vector* was digested with AclI to obtain a suitable vector for electroporation into stem cells



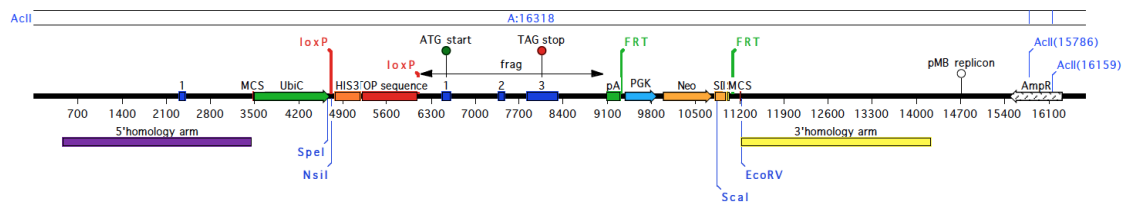

**Supplementary material S4, Weight of selected tissues and organs, corresponding to the manuscript:**

## **Ubiquitous transgenic overexpression of C-C chemokine ligand 2: a model to assess the combined effect of high energy intake and continuous low-grade inflammation?**

Esther Rodríguez-Gallego, Marta Riera-Borrull, Anna Hernández-Aguilera, Roger Mariné-Casadó, Anna Rull, Raúl Beltrán-Debón, Fedra Luciano-Mateo, Javier A. Menéndez<sup>1</sup>, Alejandro Vazquez-Martin<sup>1</sup>, Juan J. Sirvent<sup>2</sup>, Vicente Martín-Paredero<sup>3</sup>, Angel L. Corbí<sup>4</sup>, Elena Sierra-Filardi<sup>4</sup>, Gerard Aragonès, Anabel García-Heredia, Jordi Camps, Carlos Alonso-Villaverde<sup>5</sup>, Jorge Joven\*

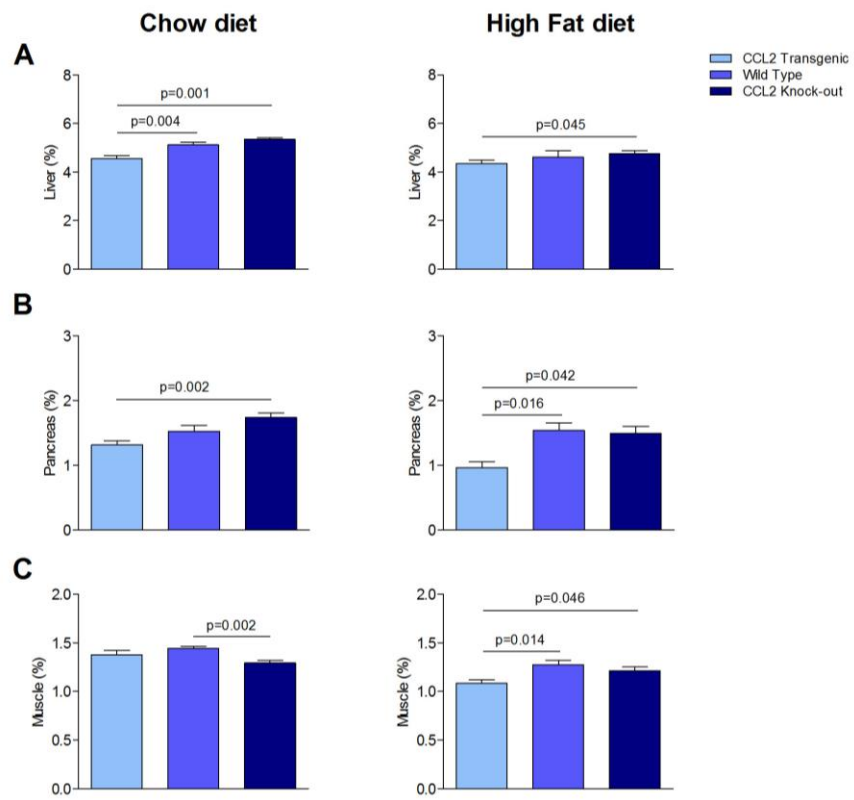

Supplementary material S5, Weight of adipose tissues in the three strains after 14 weeks of a chow diet or high fat diet treatment.

## Ubiquitous transgenic overexpression of C-C chemokine ligand 2: a model to assess the combined effect of high energy intake and continuous low-grade inflammation?

Esther Rodríguez-Gallego, Marta Riera-Borrull, Anna Hernández-Aguilera, Roger Mariné-Casadó, Anna Rull, Raúl Beltrán-Debón, Fedra Luciano-Mateo, Javier A. Menéndez<sup>1</sup>, Alejandro Vazquez-Martin<sup>1</sup>, Juan J. Sirvent<sup>2</sup>, Vicente Martín-Paredero<sup>3</sup>, Angel L. Corbí<sup>4</sup>, Elena Sierra-Filardi<sup>4</sup>, Gerard Aragonès, Anabel García-Heredia, Jordi Camps, Carlos Alonso-Villaverde<sup>5</sup>, Jorge Joven\*

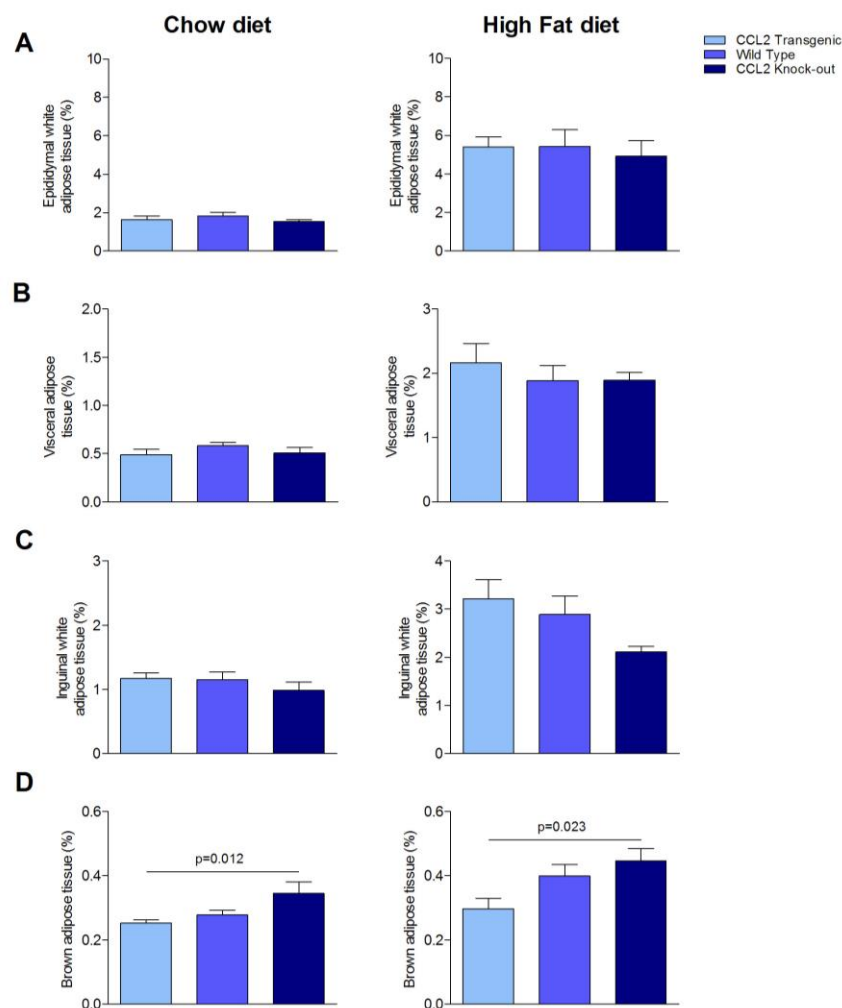



## Ubiquitous transgenic overexpression of C-C chemokine ligand 2: a model to assess the combined effect of high energy intake and continuous low-grade inflammation?

Esther Rodríguez-Gallego, Marta Riera-Borrull, Anna Hernández-Aguilera, Roger Mariné-Casadó, Anna Rull, Raúl Beltrán-Debón, Fedra Luciano-Mateo, Javier A. Menéndez<sup>1</sup>, Alejandro Vazquez-Martin<sup>1</sup>, Juan J. Sirvent<sup>2</sup>, Vicente Martín-Paredero<sup>3</sup>, Angel L. Corbí<sup>4</sup>, Elena Sierra-Filardi<sup>4</sup>, Gerard Aragonès, Anabel García-Heredia, Jordi Camps, Carlos Alonso-Villaverde<sup>5</sup>, Jorge Joven\*

Oral glucose tolerance tests displayed a significant effect of high fat, high-cholesterol diet on insulin resistance even with a short-term manipulation. However, differences among strains fed the same diet were negligible either in 16 and 24 weeks old (A, B). Plasma glucose was higher in CCL2 overexpressors than in other strains and the effect of diet was also more evident (C). These differences disappeared when the dietary treatment was for 14 weeks (D).

\* P<0.05 with respect to relevant pair.

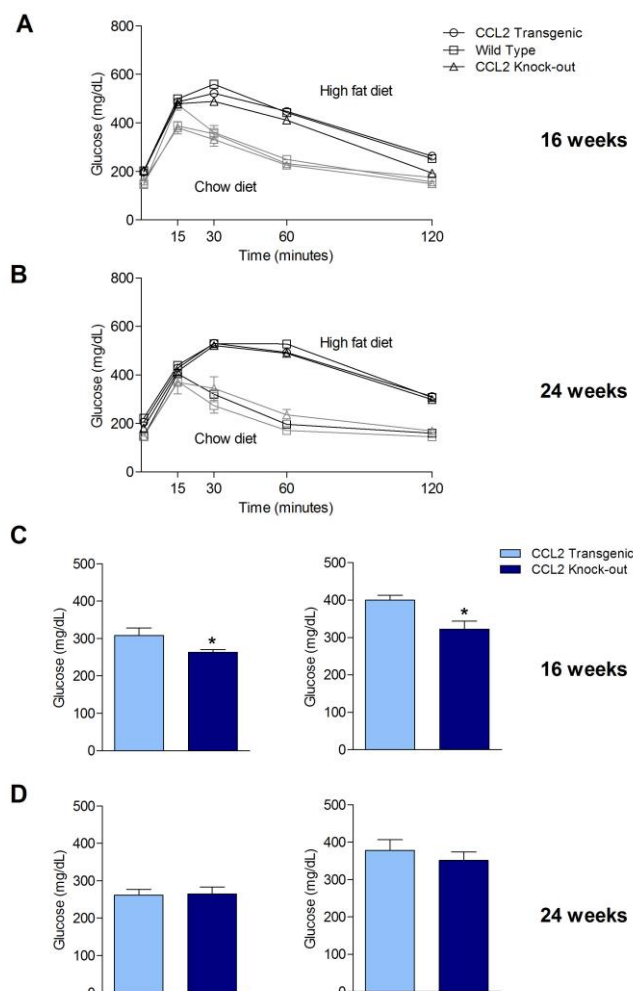

**Supplementary material S7, expression of fatty acid synthase and AMPK in the liver, corresponding to the manuscript:**

## **Ubiquitous transgenic overexpression of C-C chemokine ligand 2: a model to assess the combined effect of high energy intake and continuous low-grade inflammation?**

Esther Rodríguez-Gallego, Marta Riera-Borrull, Anna Hernández-Aguilera, Roger Mariné-Casadó, Anna Rull, Raúl Beltrán-Debón, Fedra Luciano-Mateo, Javier A. Menéndez<sup>1</sup>, Alejandro Vazquez-Martin<sup>1</sup>, Juan J. Sirvent<sup>2</sup>, Vicente Martín-Paredero<sup>3</sup>, Angel L. Corbí<sup>4</sup>, Elena Sierra-Filardi<sup>4</sup>, Gerard Aragonès, Anabel García-Heredia, Jordi Camps, Carlos Alonso-Villaverde<sup>5</sup>, Jorge Joven\*

Representative immunoblottings in the liver of transgenic and KO mice fed chow diet (A,C,D) and high-fat diet (B,E, F) of FASN and activated AMPK and the respective calculations (C-F) .

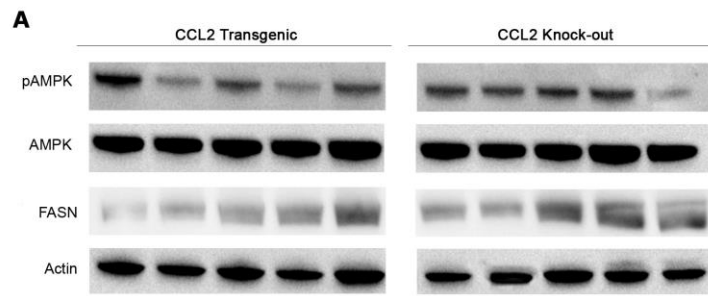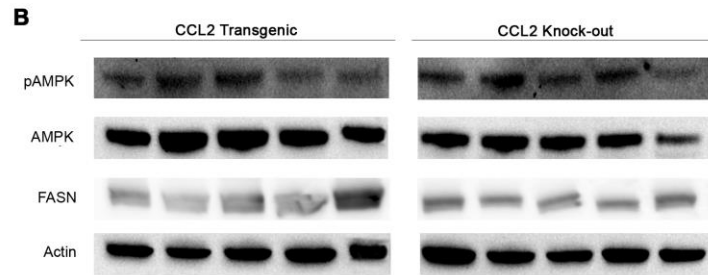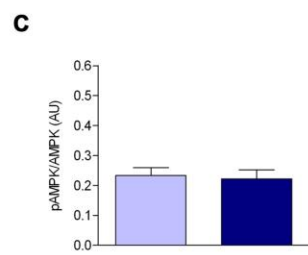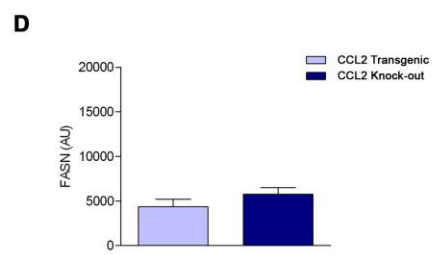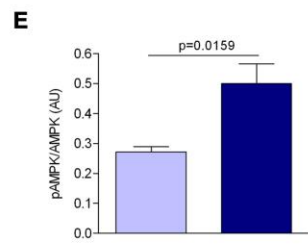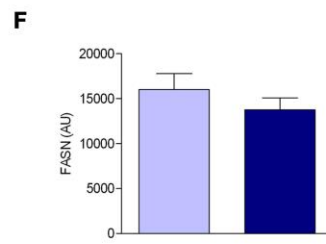

**Supplementary material S8 dietary fat and overexpression of CCL2 modify the size, number and morphology of liver macrophages also after 14 weeks of dietary treatment corresponding to the manuscript:**

## **Ubiquitous transgenic overexpression of C-C chemokine ligand 2: a model to assess the combined effect of high energy intake and continuous low-grade inflammation?**

Esther Rodríguez-Gallego, Marta Riera-Borrull, Anna Hernández-Aguilera, Roger Mariné-Casadó, Anna Rull, Raúl Beltrán-Debón, Fedra Luciano-Mateo, Javier A. Menéndez<sup>1</sup>, Alejandro Vazquez-Martin<sup>1</sup>, Juan J. Sirvent<sup>2</sup>, Vicente Martín-Paredero<sup>3</sup>, Angel L. Corbí<sup>4</sup>, Elena Sierra-Filardi<sup>4</sup>, Gerard Aragonès, Anabel García-Heredia, Jordi Camps, Carlos Alonso-Villaverde<sup>5</sup>, Jorge Joven\*

Dietary fat (right column) and CCL2 expression modify the size, number and morphology of liver macrophages with respect to those fed a chow diet (left column) as assessed with F4/80 staining. Values for stained area and length of macrophages (A-D) are illustrated with representative microphotographs from transgenic (E,F), WT (G,H) and KO mice (I,J).



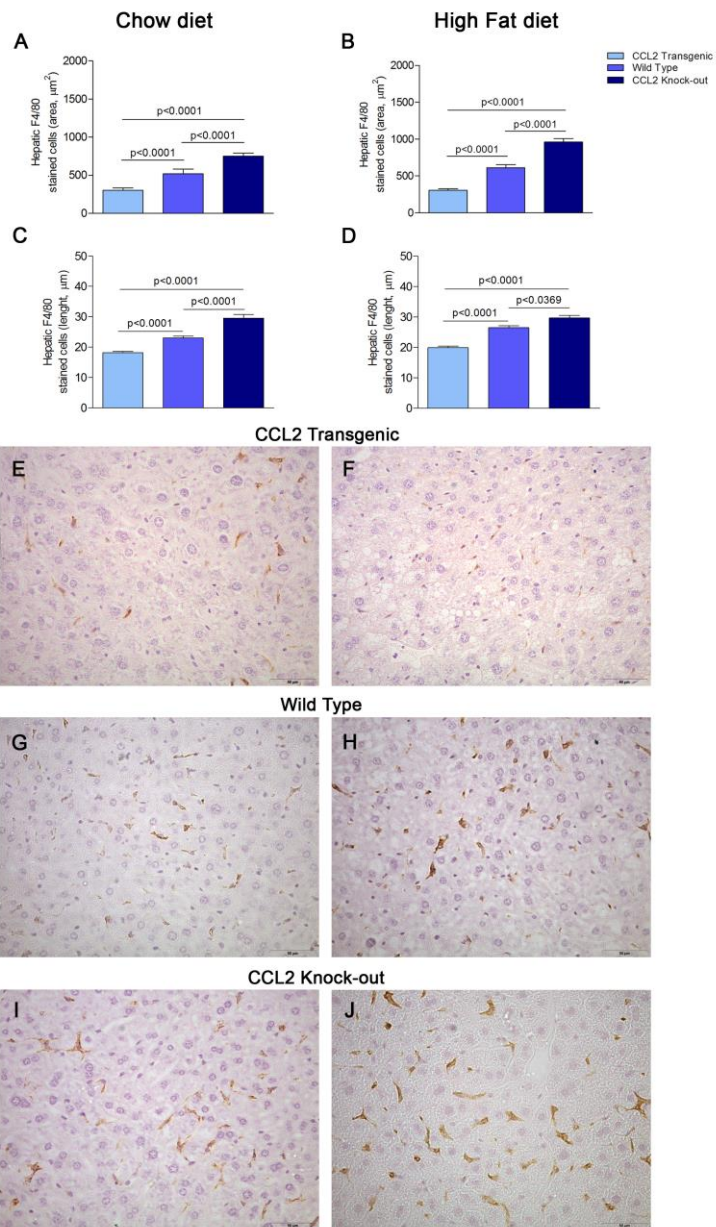

## **Ubiquitous transgenic overexpression of C-C chemokine ligand 2: a model to assess the combined effect of high energy intake and continuous low-grade inflammation?**

Esther Rodríguez-Gallego, Marta Riera-Borrull, Anna Hernández-Aguilera, Roger Mariné-Casadó, Anna Rull, Raúl Beltrán-Debón, Fedra Luciano-Mateo, Javier A. Menéndez<sup>1</sup>, Alejandro Vazquez-Martin<sup>1</sup>, Juan J. Sirvent<sup>2</sup>, Vicente Martín-Paredero<sup>3</sup>, Angel L. Corbí<sup>4</sup>, Elena Sierra-Filardi<sup>4</sup>, Gerard Aragonès, Anabel García-Heredia, Jordi Camps, Carlos Alonso-Villaverde<sup>5</sup>, Jorge Joven\*

Transgenic mice fed high-fat diet died prematurely after a progressive decrease in weight and activity (A,B). The size of the spleen in transgenic animals was higher than in controls and there were abundant megakaryocytes (C, D). The livers were also higher in transgenic mice where steatosis and signs of regenerative tissue and apoptotic nuclei were numerous (E,F)

**A**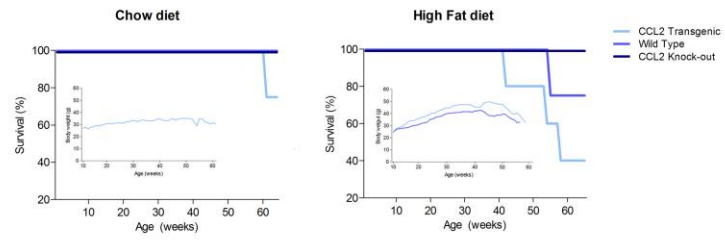**B**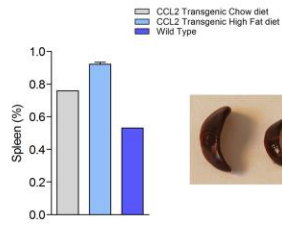**C**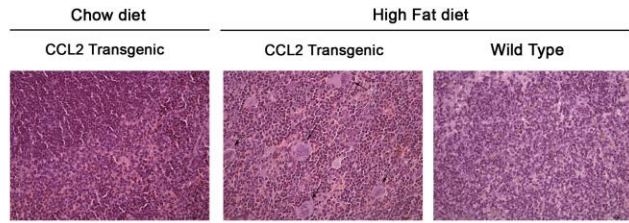**D**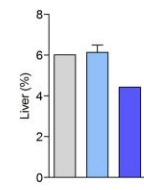**E**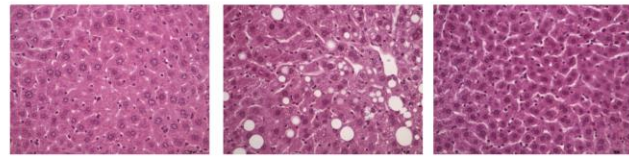

Supplement: f1 [file 953841.f1.pdf]
